# Supplementary material for: Effect of structural fluctuations on charge carrier mobility in thiophene, thiazole and thiazolothiazole based oligomers
Source: Royal Society of Chemistry journal article supplement (doi:10.1039/c3cp53099j), 2013-01-01
Supplement: c3cp53099j.pdf [file c3cp53099j.pdf]

**Supporting Information**  
**Effect of Structural Fluctuations on Charge Carrier Mobility in Thiophene, Thiazole**  
**and Thiazolothiazole based Oligomers**

K. Navamani, G. Saranya, P. Kolandaivel and K. Senthilkumar\*  
Department of Physics, Bharathiar University, Coimbatore-641 046

\*Corresponding author: [ksenthil@buc.edu.in](mailto:ksenthil@buc.edu.in)

**Fig. S1.** The optimized structure of thiophene, thiazole and thiazolothiazole based oligomers.

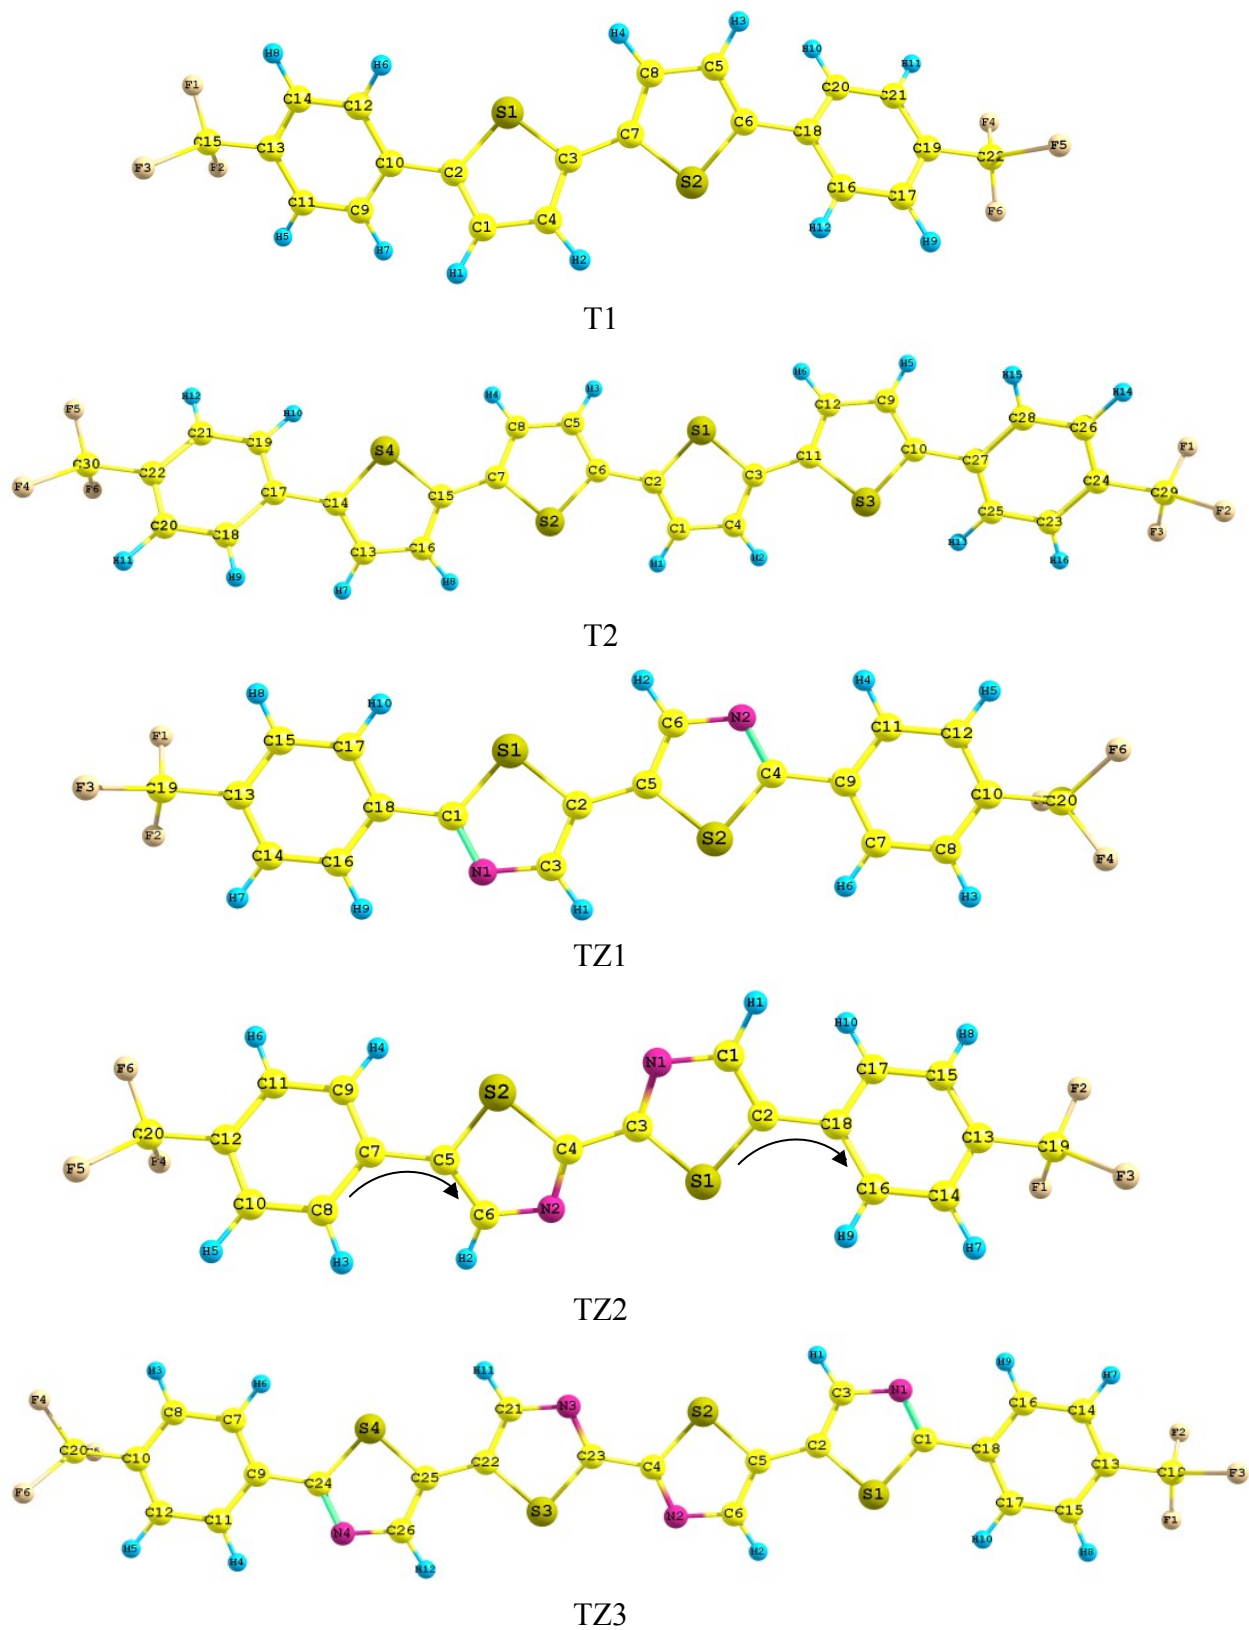

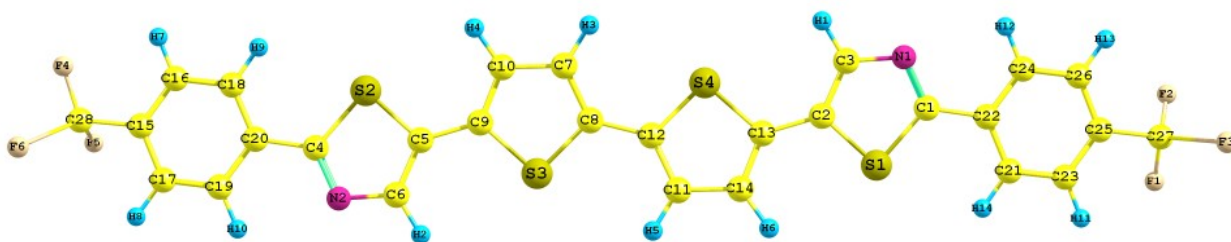

TZ4

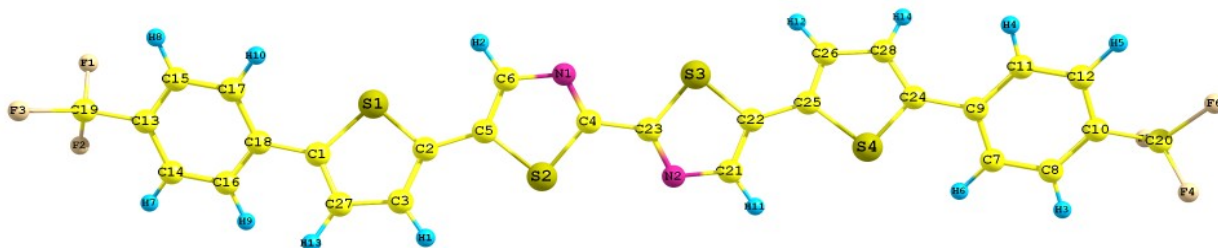

TZ5

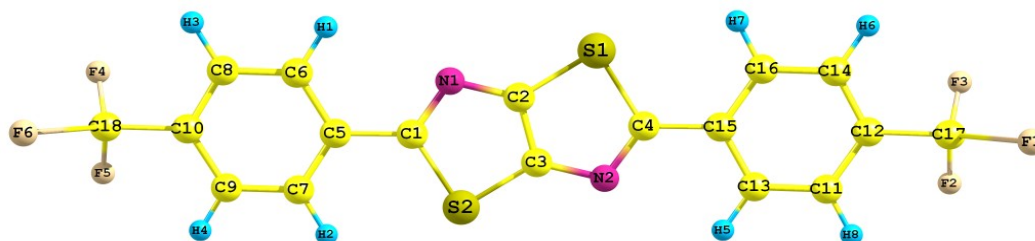

TZTZ1

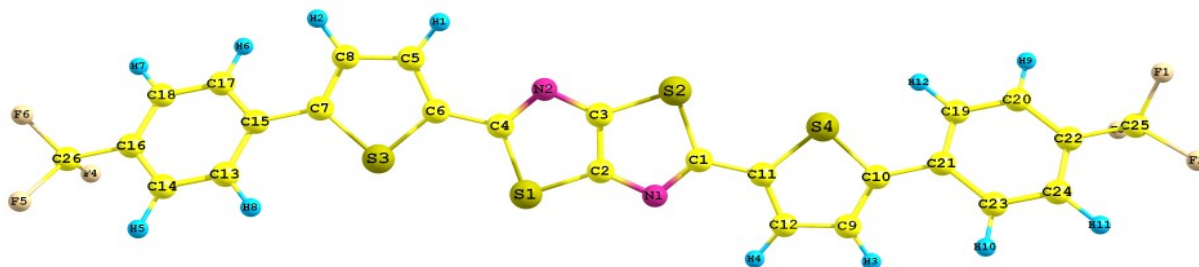

TZTZ2

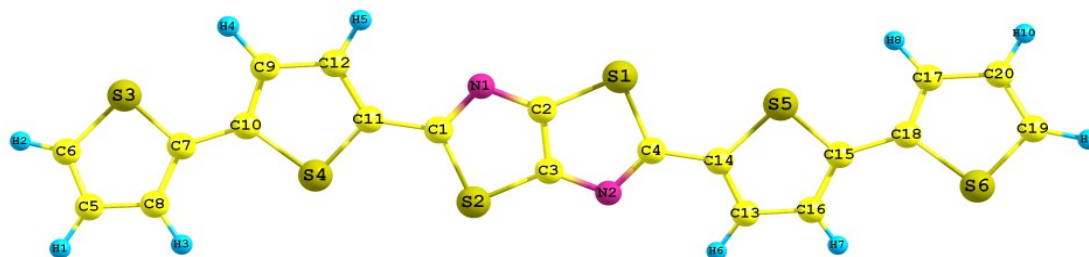

TZTZ3

**Fig. S2. (a)** A-The mean squared displacement, B-survival probability, C-time dependence of rate coefficient and D-disorder drift with the simulation time for hole transport in the studied thiophene (T1, T2), thiazole (TZ1-TZ5) and thiazolothiazole (TZTZ1-TZTZ3) oligomers.

T1

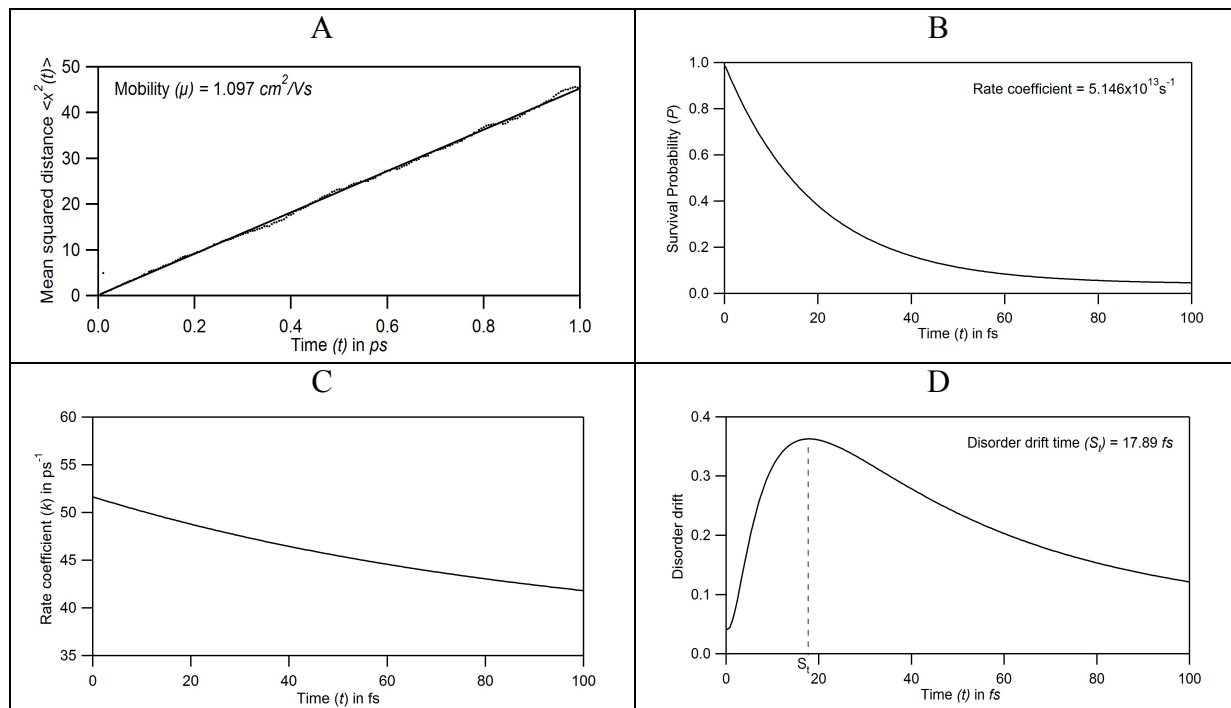

T2

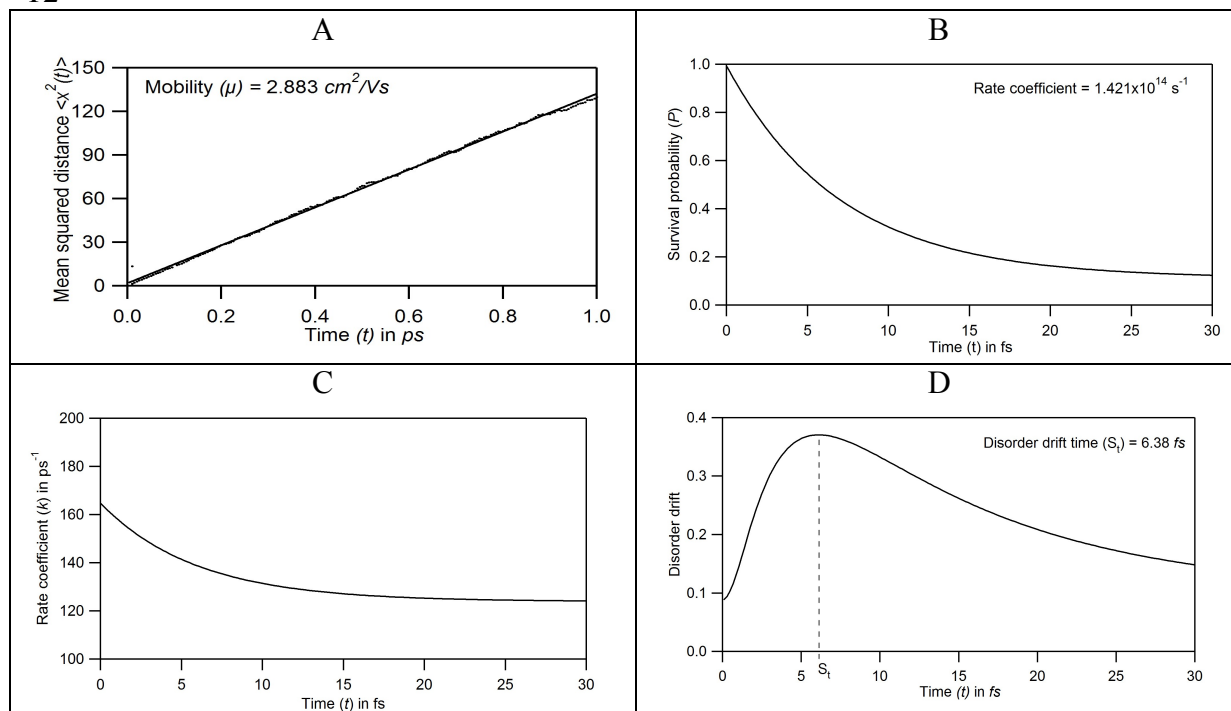

### TZ2

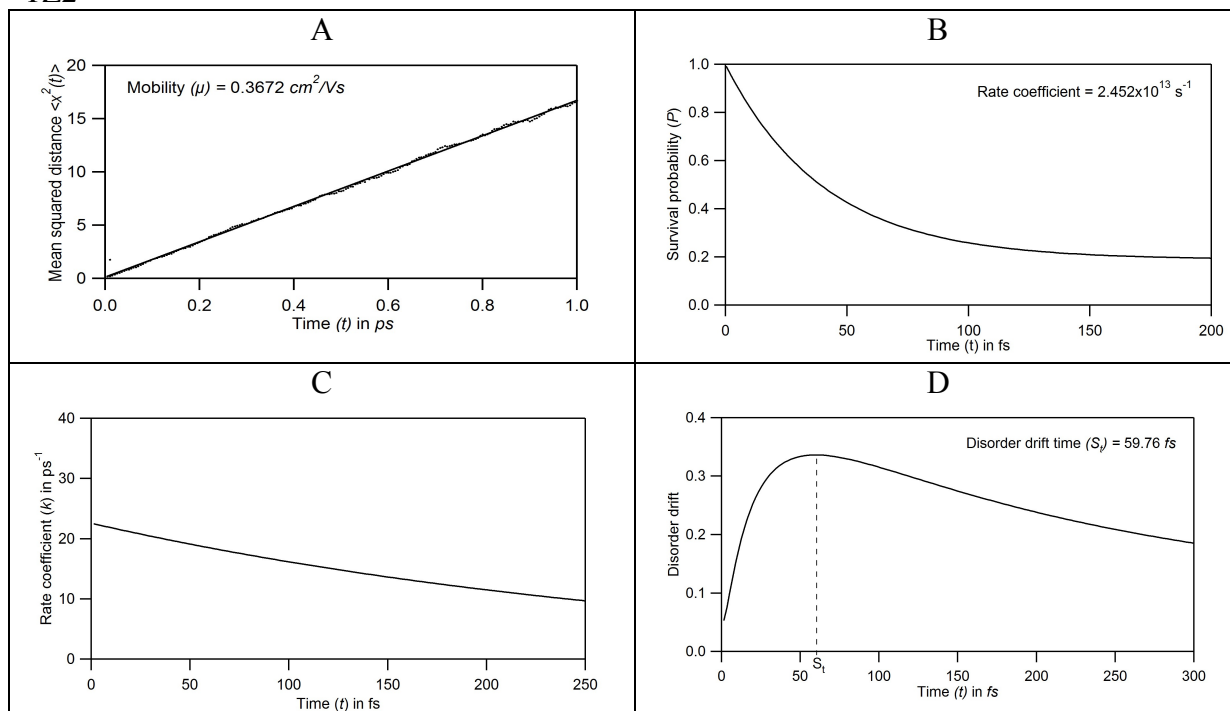

### TZ3

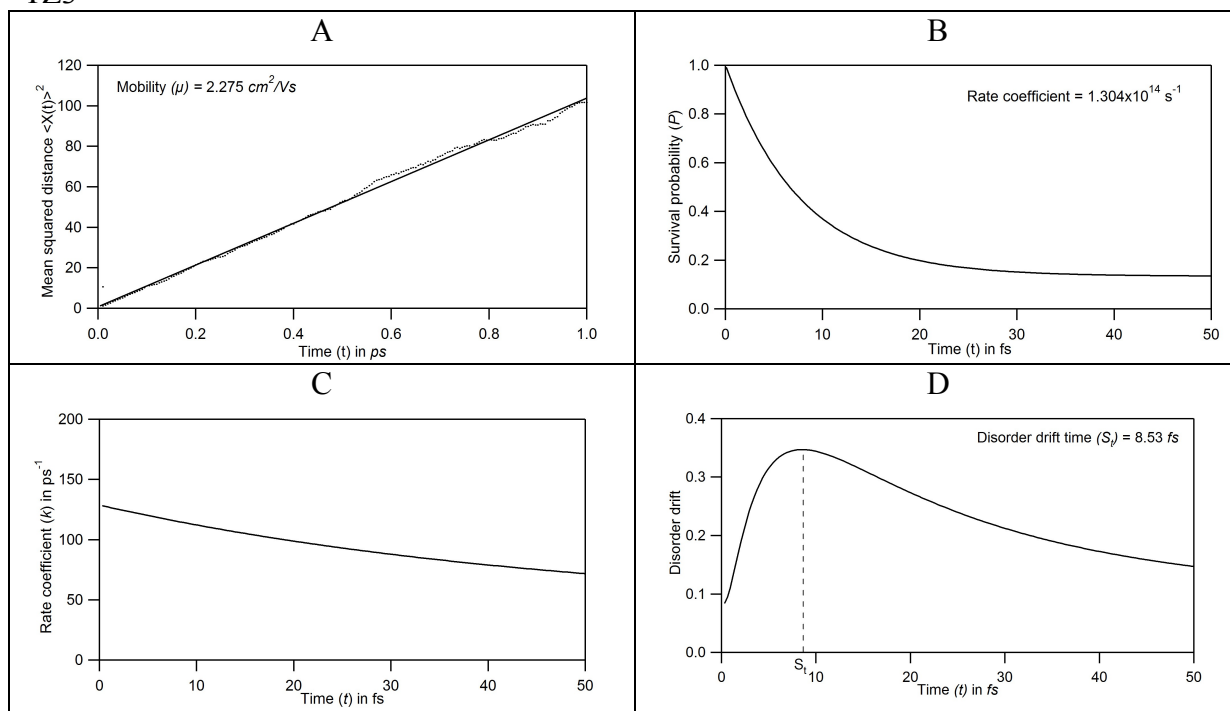

### TZ4

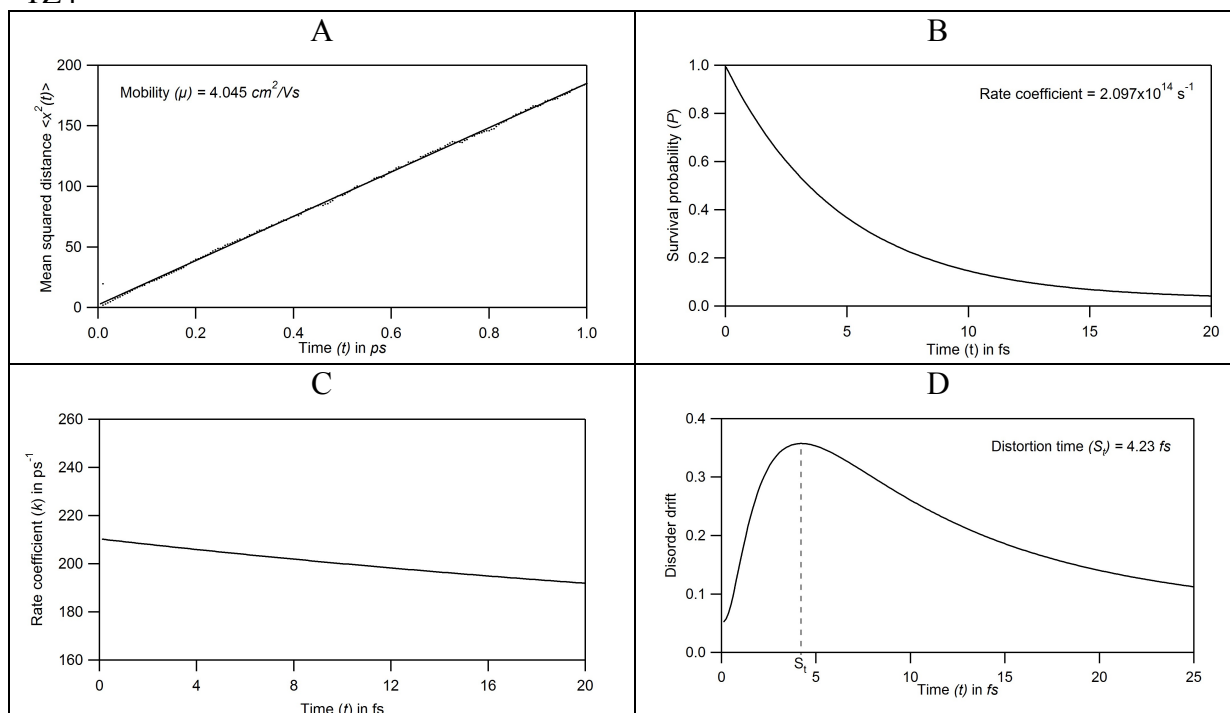

### TZ5

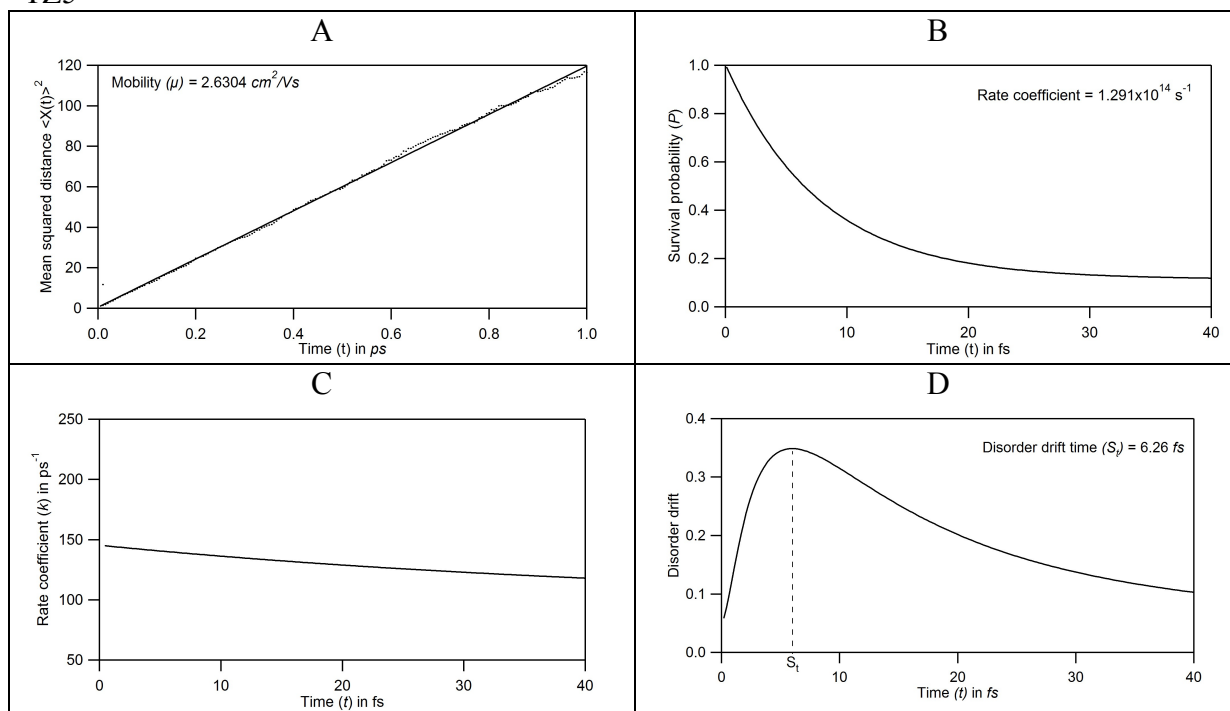

### TZTZ1

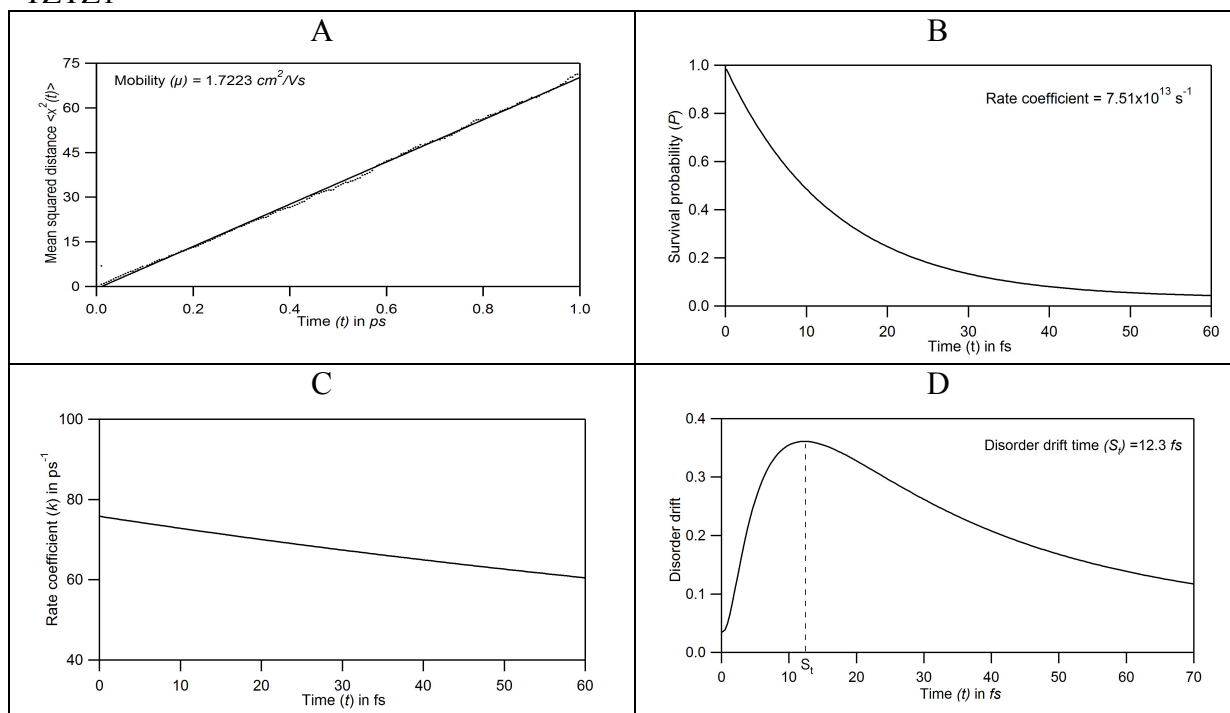

### TZTZ2

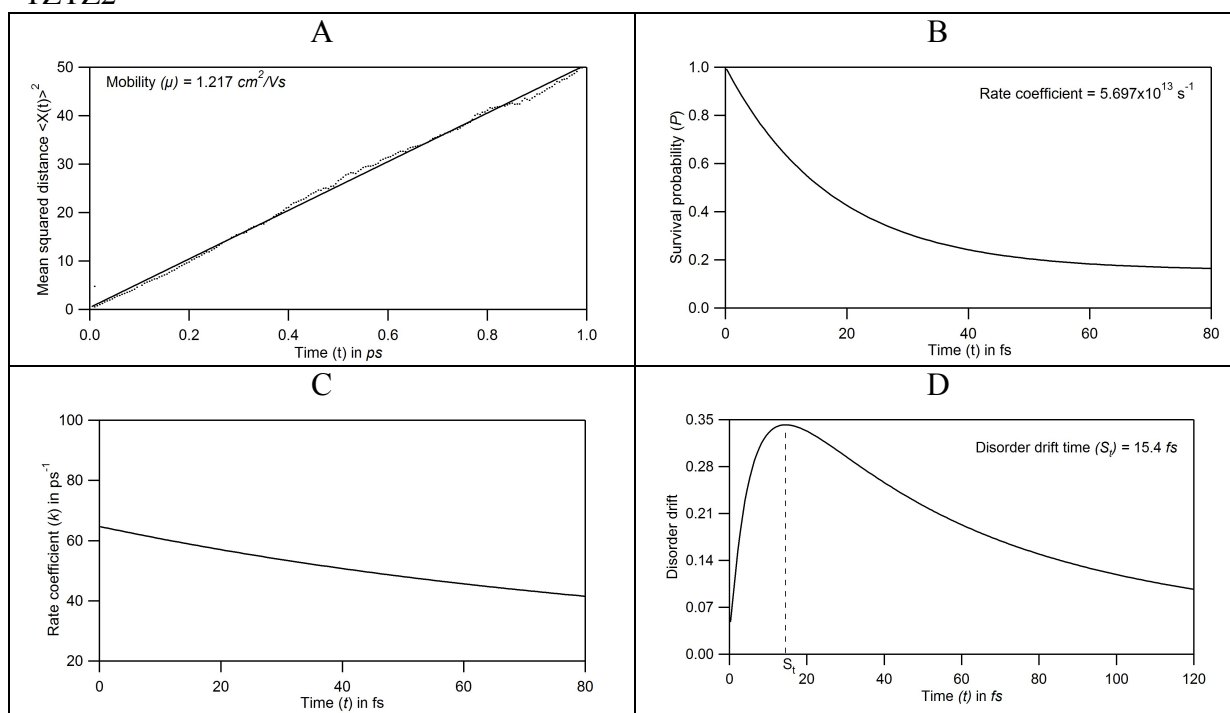

TZTZ3

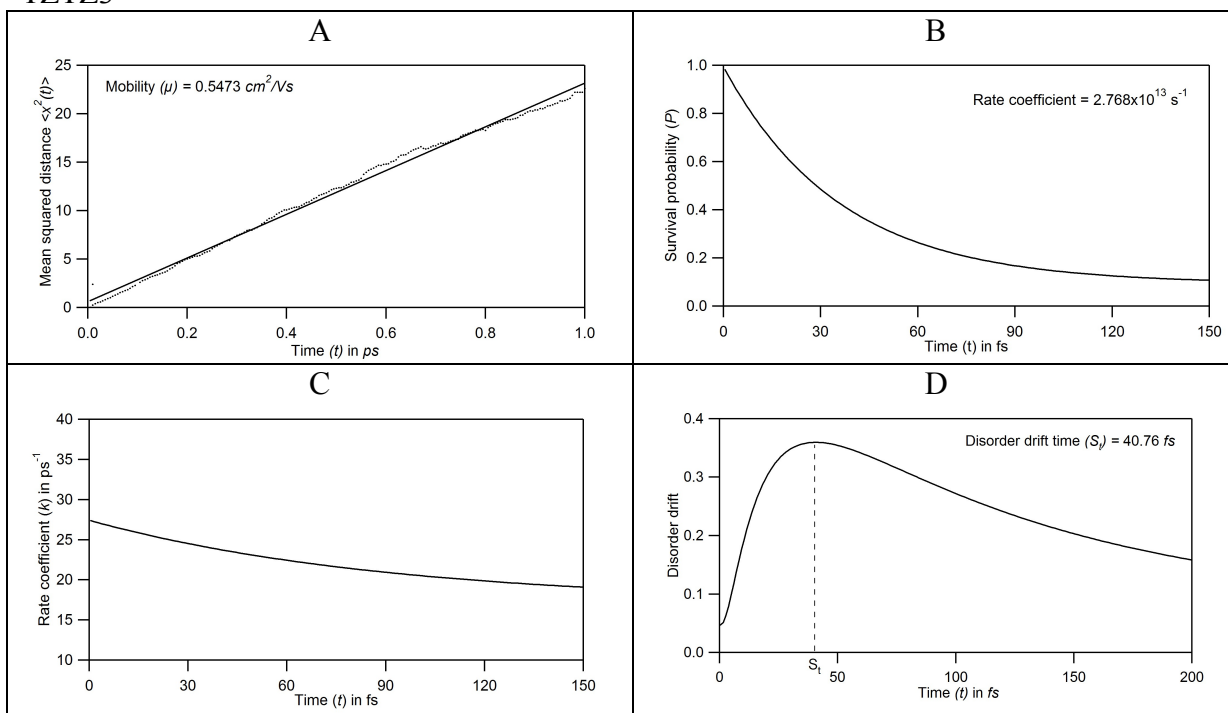



**Fig. S2. (b)** A-The mean squared displacement, B-survival probability, C-time dependence of rate coefficient and D-disorder drift with the simulation time for electron transport in the studied thiophene (T1, T2), thiazole (TZ1-TZ5) and thiazolothiazole (TZTZ1-TZTZ3) oligomers.

T1

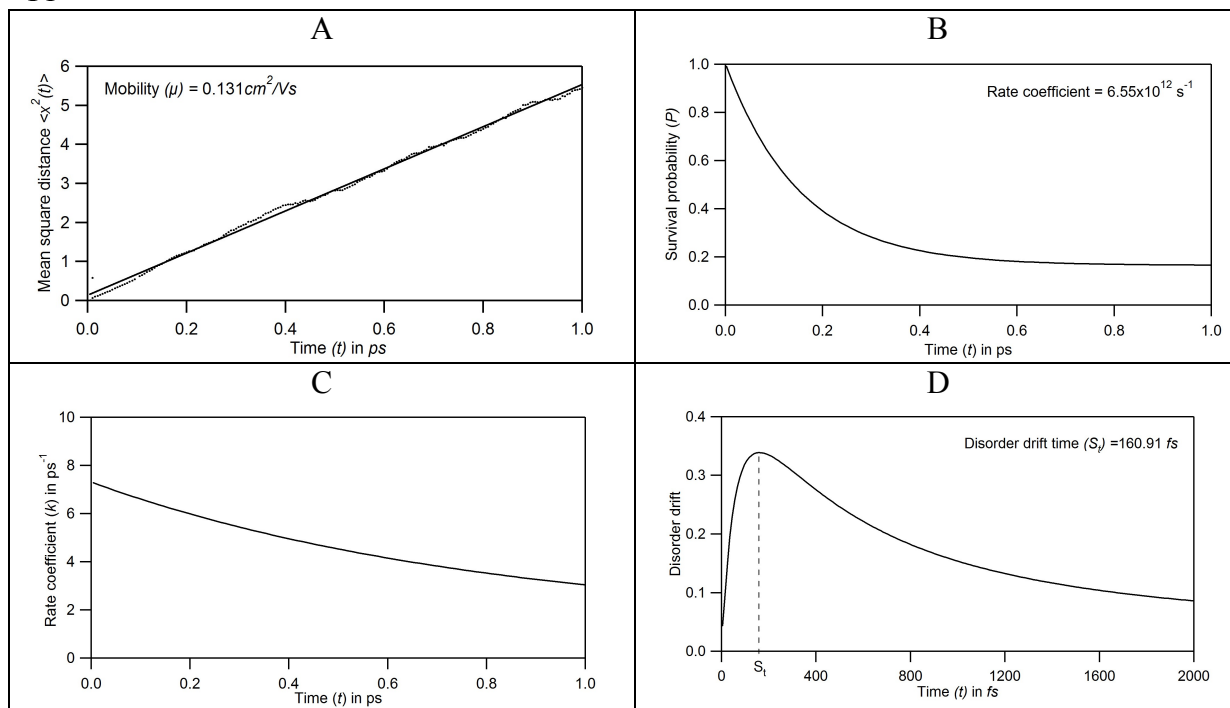

T2

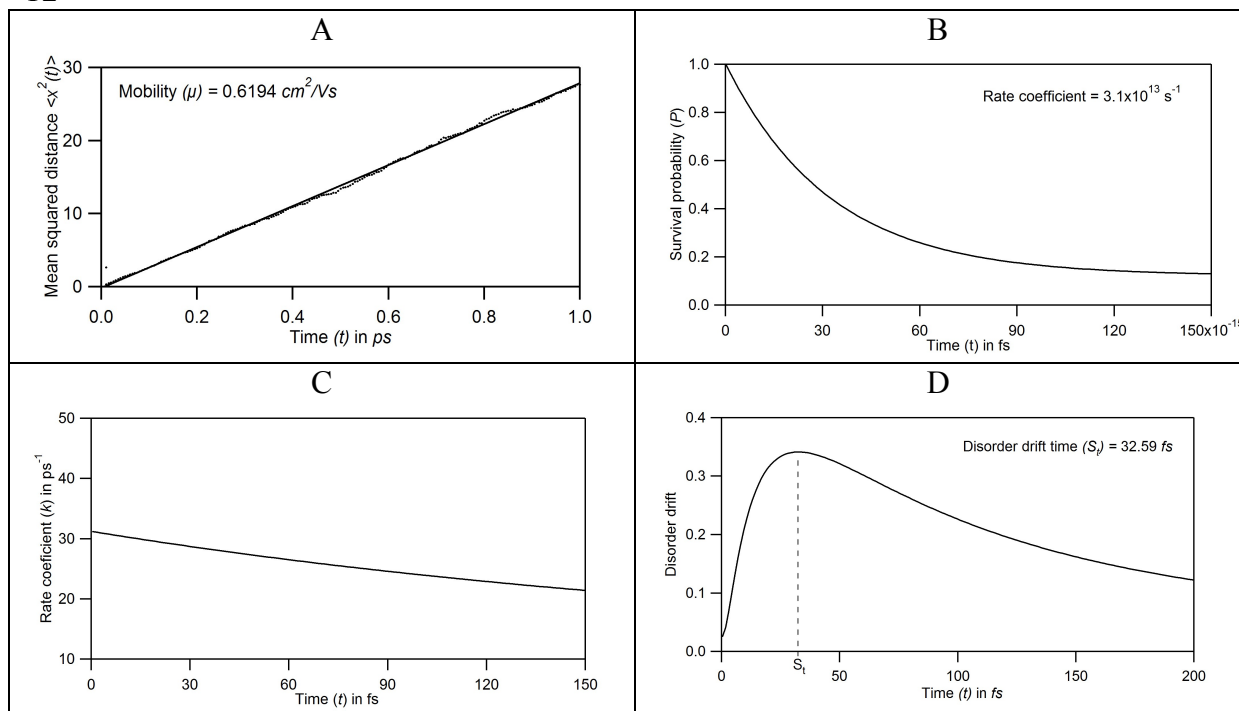

### TZ2

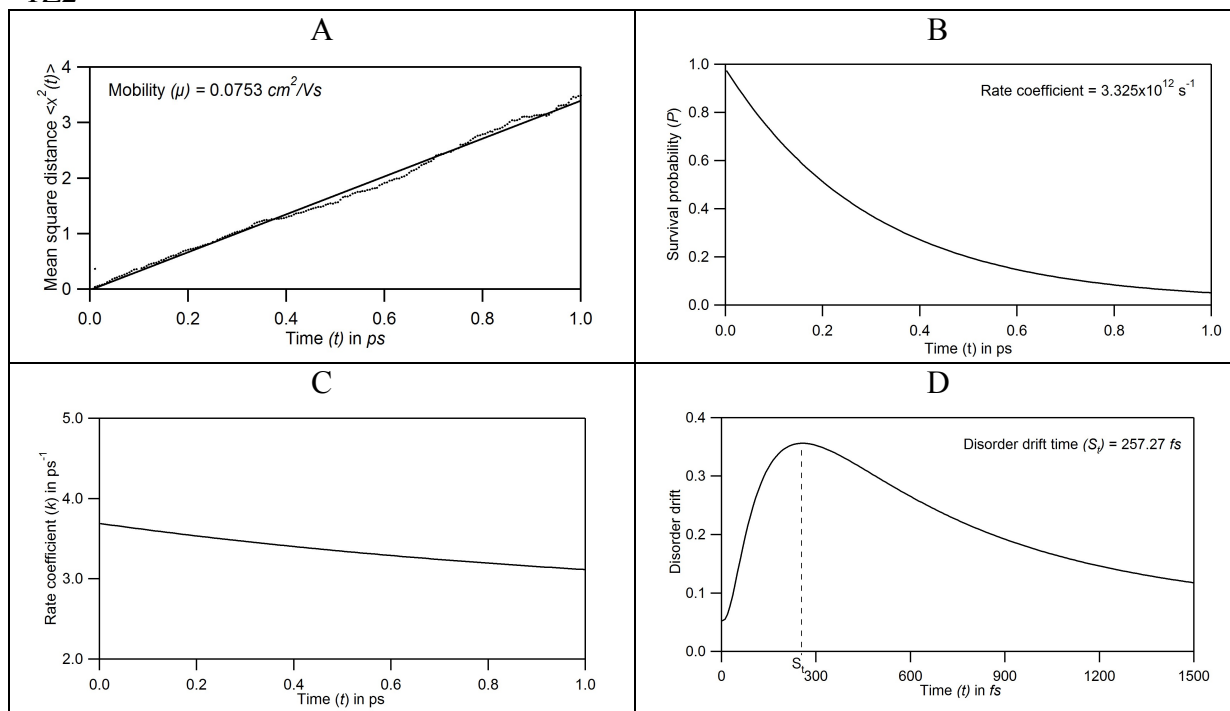

### TZ3

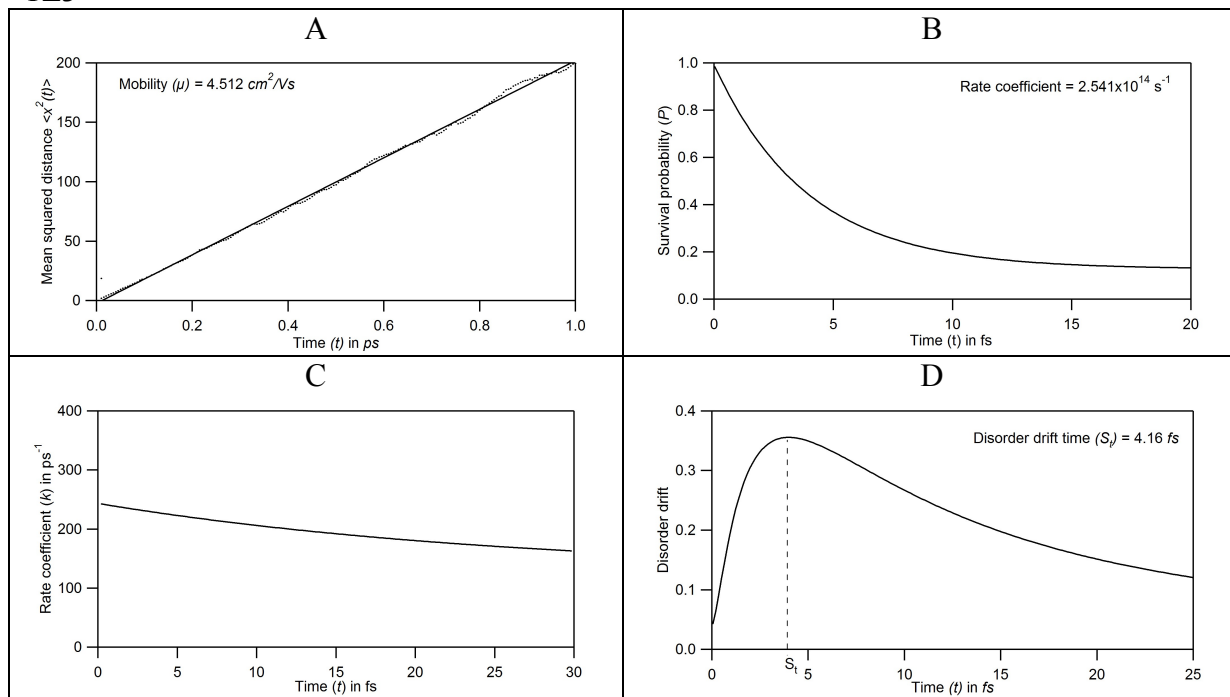

### TZ4

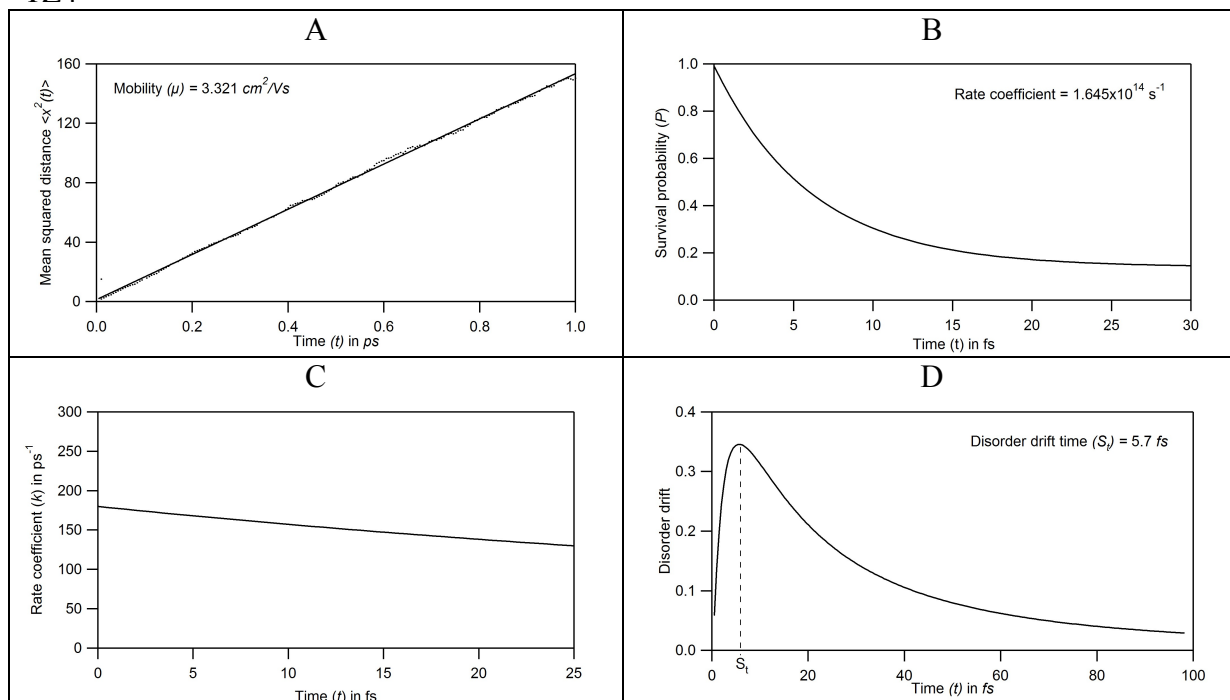

### TZ5

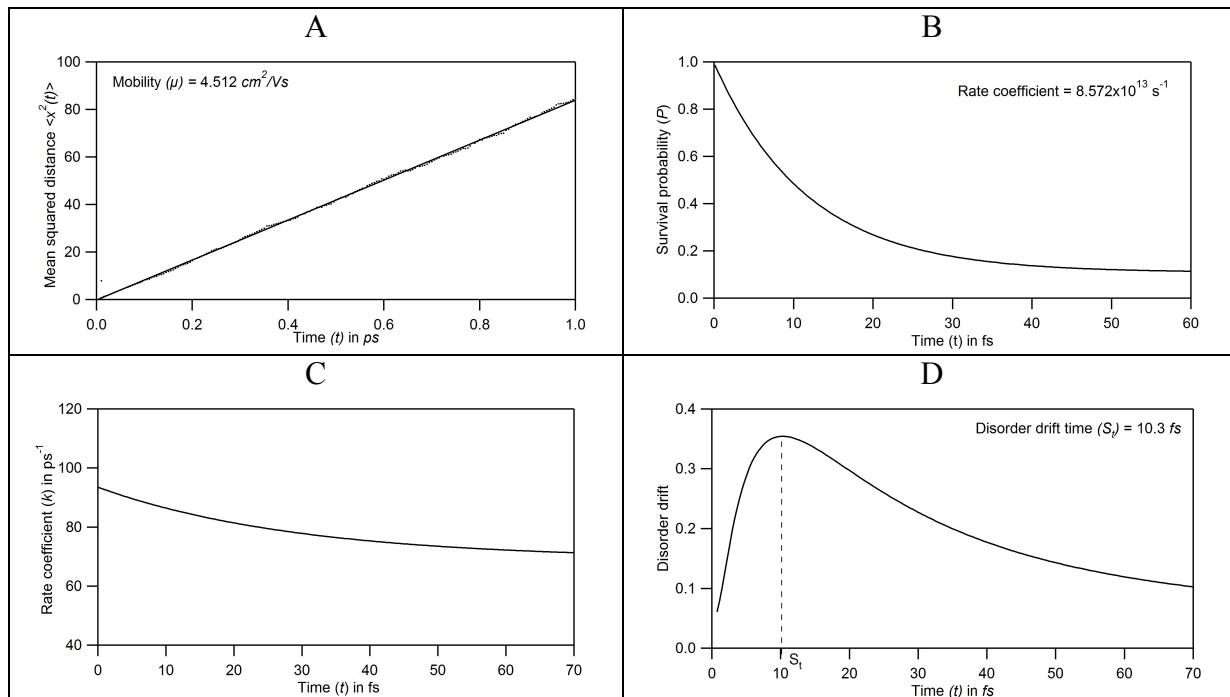

### TZTZ1

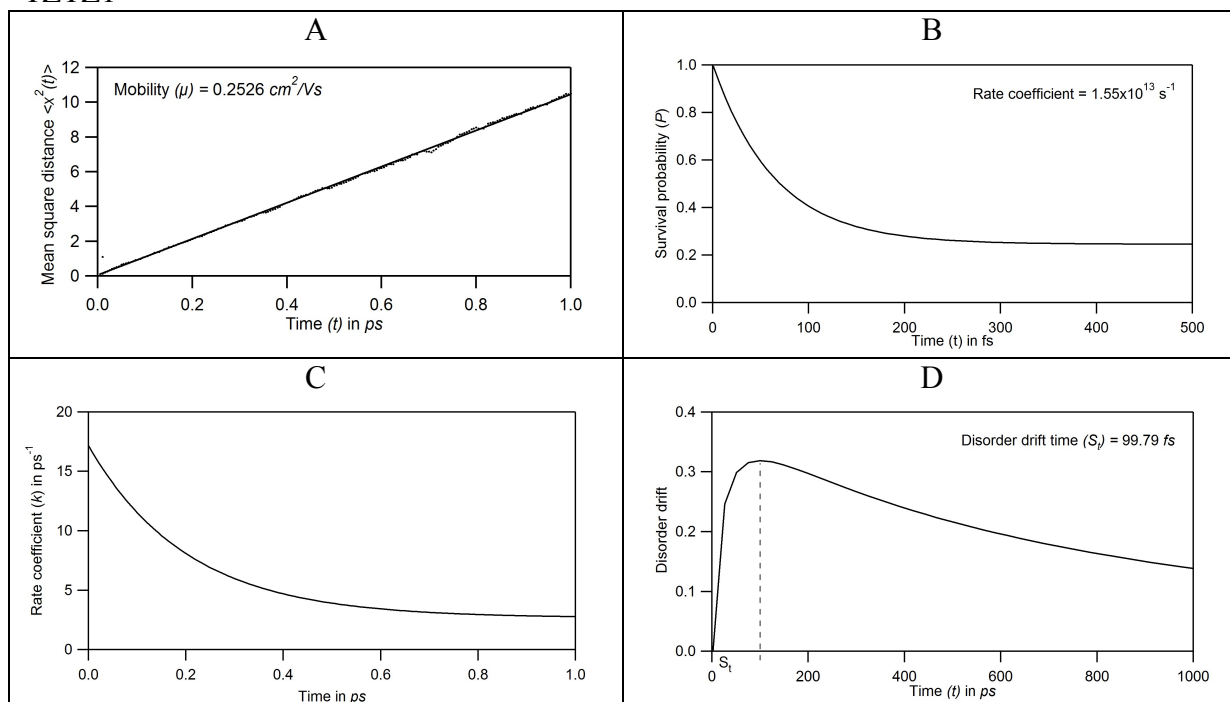

### TZTZ2

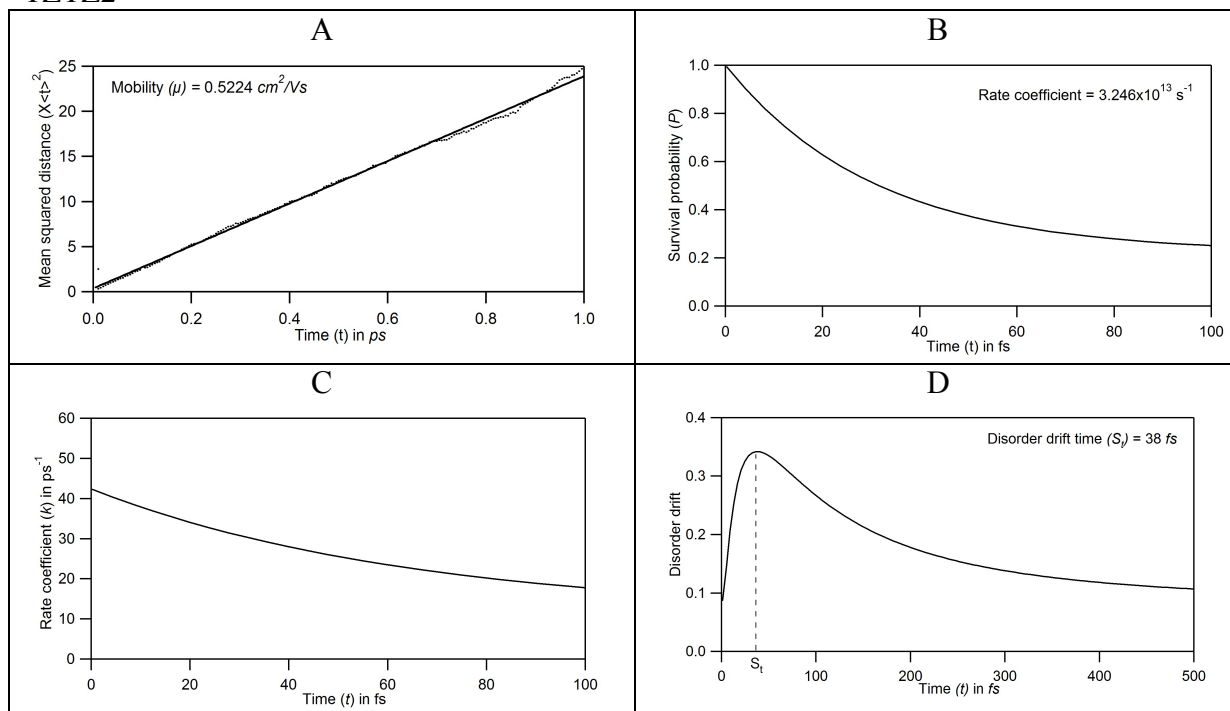

TZTZ3

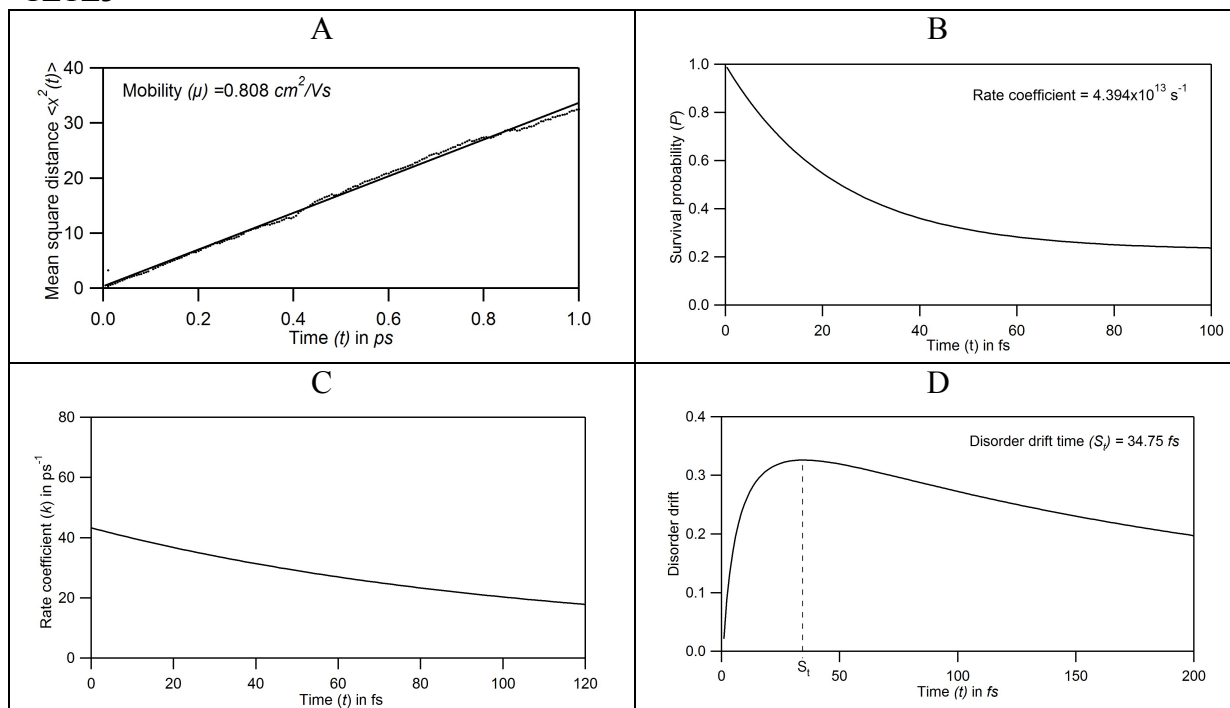

**Table S1:** Calculated effective charge transfer integral ( $J_{eff}$ , in eV) of the T2, TZ1 and TZTZ2 oligomers using statistical average of orbital potentials (SAOP) exchange correlation functional method for hole transport.

| Stacking angle ( $\theta$ )<br>in deg. | Effective charge transfer integral ( $J_{eff}$ ) in eV |              |                |
|----------------------------------------|--------------------------------------------------------|--------------|----------------|
|                                        | Oligomer T2                                            | Oligomer TZ1 | Oligomer TZTZ2 |
| 0                                      | 0.332                                                  | 0.326        | 0.249          |
| 15                                     | 0.236                                                  | 0.260        | 0.175          |
| 30                                     | 0.098                                                  | 0.165        | 0.096          |
| 45                                     | 0.042                                                  | 0.088        | 0.065          |
| 60                                     | 0.021                                                  | 0.040        | 0.045          |
| 75                                     | 0.018                                                  | 0.015        | 0.034          |
| 90                                     | 0.017                                                  | 0.0002       | 0.032          |

**Table S2:** Calculated effective charge transfer integral ( $J_{eff}$ , in eV) of the T2, TZ1 and TZTZ2 oligomers using statistical average of orbital potentials (SAOP) exchange correlation functional method for electron transport.

| Stacking angle ( $\theta$ )<br>in deg. | Effective charge transfer integral ( $J_{eff}$ ) in eV |              |                |
|----------------------------------------|--------------------------------------------------------|--------------|----------------|
|                                        | Oligomer T2                                            | Oligomer TZ1 | Oligomer TZTZ2 |
| 0                                      | 0.322                                                  | 0.382        | 0.273          |
| 15                                     | 0.155                                                  | 0.220        | 0.136          |
| 30                                     | 0.033                                                  | 0.089        | 0.042          |
| 45                                     | 0.073                                                  | 0.045        | 0.005          |
| 60                                     | 0.128                                                  | 0.081        | 0.044          |
| 75                                     | 0.153                                                  | 0.138        | 0.036          |
| 90                                     | 0.138                                                  | 0.162        | 0.002          |

**Table S3. (a)** Contribution of HOMO of monomer 1 (M1) and monomer 2 (M2) for charge transfer integral corresponding to hole transport in thiophene (T1, T2) oligomers.

| Stacking angle ( $\theta$ )<br>in deg. | Contribution of HOMO of each monomer<br>for charge transfer integral (in %) |    |    |    |
|----------------------------------------|-----------------------------------------------------------------------------|----|----|----|
|                                        | T1                                                                          |    | T2 |    |
|                                        | M1                                                                          | M2 | M1 | M2 |
| 0                                      | 50                                                                          | 49 | 50 | 49 |
| 15                                     | 59                                                                          | 40 | 55 | 44 |
| 30                                     | 74                                                                          | 25 | 67 | 31 |
| 45                                     | 86                                                                          | 13 | 73 | 25 |
| 60                                     | 84                                                                          | 14 | 86 | 12 |
| 75                                     | 92                                                                          | 7  | 92 | 6  |
| 90                                     | 93                                                                          | 7  | 95 | 4  |

**Table S3. (b)** Contribution of HOMO of monomer 1 (M1) and monomer 2 (M2) for charge transfer integral corresponding to hole transport in thiazole (TZ1-TZ5) oligomers.

| Stacking angle ( $\theta$ )<br>in deg. | Contribution of HOMO of each monomer for charge transfer integral (in %) |    |     |    |     |    |     |    |     |    |    |
|----------------------------------------|--------------------------------------------------------------------------|----|-----|----|-----|----|-----|----|-----|----|----|
|                                        | TZ1                                                                      |    | TZ2 |    | TZ3 |    | TZ4 |    | TZ5 |    |    |
|                                        | M1                                                                       | M2 | M1  | M2 | M1  | M2 | M1  | M2 | M1  | M2 |    |
| 0                                      | 50                                                                       | 50 | 50  | 50 | 50  | 50 | 50  | 50 | 50  | 50 | 50 |
| 15                                     | 53                                                                       | 49 | 50  | 49 | 54  | 45 | 52  | 47 | 53  | 46 |    |
| 30                                     | 58                                                                       | 42 | 50  | 48 | 61  | 38 | 55  | 43 | 61  | 38 |    |
| 45                                     | 70                                                                       | 30 | 78  | 20 | 81  | 18 | 52  | 47 | 95  | 4  |    |
| 60                                     | 82                                                                       | 17 | 90  | 7  | 52  | 48 | 93  | 7  | 94  | 5  |    |
| 75                                     | 85                                                                       | 14 | 94  | 3  | 66  | 33 | 97  | 2  | 89  | 10 |    |
| 90                                     | 98                                                                       | 1  | 97  | 1  | 99  | 1  | 94  | 3  | 92  | 8  |    |

**Table S3. (c)** Contribution of HOMO of monomer 1 (M1) and monomer 2 (M2) for charge transfer integral corresponding to hole transport in thiazolothiazole (TZZT1-TZZT3) oligomers.

| Stacking angle ( $\theta$ )<br>in deg. | Contribution of HOMO of each monomer for charge transfer integral (in %) |    |       |    |       |    |
|----------------------------------------|--------------------------------------------------------------------------|----|-------|----|-------|----|
|                                        | TZZT1                                                                    |    | TZZT2 |    | TZZT3 |    |
|                                        | M1                                                                       | M2 | M1    | M2 | M1    | M2 |
| 0                                      | 52                                                                       | 48 | 50    | 49 | 50    | 50 |
| 15                                     | 52                                                                       | 48 | 51    | 48 | 50    | 49 |
| 30                                     | 56                                                                       | 43 | 50    | 49 | 60    | 39 |
| 45                                     | 62                                                                       | 37 | 52    | 47 | 60    | 39 |
| 60                                     | 63                                                                       | 36 | 61    | 38 | 62    | 37 |
| 75                                     | 65                                                                       | 34 | 66    | 33 | 61    | 38 |
| 90                                     | 51                                                                       | 49 | 61    | 38 | 50    | 49 |

**Table S4. (a)** Contribution of LUMO of monomer 1 (M1) and monomer 2 (M2) for charge transfer integral corresponding to electron transport in thiophene (T1, T2) oligomers.

| Stacking angle ( $\theta$ )<br>in deg. | Contribution of LUMO of each monomer for charge transfer integral (in %) |    |    |    |
|----------------------------------------|--------------------------------------------------------------------------|----|----|----|
|                                        | T1                                                                       |    | T2 |    |
|                                        | M1                                                                       | M2 | M1 | M2 |
| 0                                      | 51                                                                       | 48 | 51 | 48 |
| 15                                     | 61                                                                       | 38 | 58 | 41 |
| 30                                     | 93                                                                       | 6  | 80 | 19 |
| 45                                     | 85                                                                       | 14 | 63 | 37 |
| 60                                     | 64                                                                       | 36 | 58 | 41 |
| 75                                     | 66                                                                       | 33 | 63 | 36 |
| 90                                     | 68                                                                       | 33 | 68 | 31 |

**Table S4. (b)** Contribution of LUMO of monomer 1 (M1) and monomer 2 (M2) for charge transfer integral corresponding to electron transport in thiazole (TZ1-TZ5) oligomers.

| Stacking angle ( $\theta$ )<br>in deg. | Contribution of LUMO of each monomer for<br>charge transfer integral (in %) |    |     |    |     |    |     |    |     |    |
|----------------------------------------|-----------------------------------------------------------------------------|----|-----|----|-----|----|-----|----|-----|----|
|                                        | TZ1                                                                         |    | TZ2 |    | TZ3 |    | TZ4 |    | TZ5 |    |
|                                        | M1                                                                          | M2 | M1  | M2 | M1  | M2 | M1  | M2 | M1  | M2 |
| 0                                      | 50                                                                          | 50 | 56  | 42 | 50  | 50 | 53  | 44 | 50  | 50 |
| 15                                     | 55                                                                          | 44 | 50  | 49 | 56  | 42 | 56  | 42 | 52  | 47 |
| 30                                     | 73                                                                          | 26 | 60  | 39 | 62  | 37 | 59  | 40 | 61  | 38 |
| 45                                     | 88                                                                          | 11 | 61  | 38 | 59  | 40 | 50  | 49 | 76  | 24 |
| 60                                     | 75                                                                          | 24 | 54  | 45 | 50  | 49 | 64  | 35 | 65  | 35 |
| 75                                     | 60                                                                          | 39 | 52  | 47 | 52  | 48 | 66  | 33 | 55  | 44 |
| 90                                     | 50                                                                          | 49 | 54  | 45 | 50  | 50 | 65  | 33 | 50  | 49 |

**Table S4. (c)** Contribution of LUMO of monomer 1 (M1) and monomer 2 (M2) for charge transfer integral corresponding to electron transport for thiazolothiazole (TZTZ1-TZTZ3) oligomers.

| Stacking angle ( $\theta$ )<br>in deg. | Contribution of LUMO of each monomer for<br>charge transfer Integral (in %) |    |       |    |       |    |
|----------------------------------------|-----------------------------------------------------------------------------|----|-------|----|-------|----|
|                                        | TZTZ1                                                                       |    | TZTZ2 |    | TZTZ3 |    |
|                                        | M1                                                                          | M2 | M1    | M2 | M1    | M2 |
| 0                                      | 51                                                                          | 48 | 50    | 49 | 50    | 50 |
| 15                                     | 53                                                                          | 46 | 49    | 49 | 52    | 47 |
| 30                                     | 76                                                                          | 24 | 53    | 46 | 74    | 25 |
| 45                                     | 81                                                                          | 18 | 94    | 5  | 99    | 1  |
| 60                                     | 66                                                                          | 33 | 67    | 33 | 65    | 35 |
| 75                                     | 64                                                                          | 35 | 70    | 30 | 62    | 37 |
| 90                                     | 85                                                                          | 15 | 87    | 13 | 100   | 0  |



**Table S5. (a)** Calculated bond lengths for neutral, cationic and anionic geometries for the studied oligomers.

| Molecules | Atomic specification | Bond length in Å |                   |                  |
|-----------|----------------------|------------------|-------------------|------------------|
|           |                      | Neutral geometry | Cationic geometry | Anionic geometry |
| T1        | F1-C15               | 1.347            | 1.342             | 1.355            |
|           | C15-C13              | 1.502            | 1.512             | 1.484            |
|           | C13-C11              | 1.394            | 1.393             | 1.402            |
|           | C11-C9               | 1.383            | 1.381             | 1.376            |
|           | C9-C10               | 1.404            | 1.41              | 1.421            |
|           | C10-C2               | 1.462            | 1.445             | 1.429            |
|           | C2-S1                | 1.747            | 1.742             | 1.776            |
|           | S1-C3                | 1.747            | 1.753             | 1.772            |
|           | C3-C7                | 1.443            | 1.404             | 1.405            |
|           | C7-C8                | 1.375            | 1.405             | 1.400            |
|           | C8-C5                | 1.411            | 1.38              | 1.389            |
|           | C5-C6                | 1.373            | 1.403             | 1.394            |
|           | C6-C18               | 1.472            | 1.445             | 1.429            |
| T2        | F6-C30               | 1.352            | 1.347             | 1.361            |
|           | C30-C22              | 1.502            | 1.509             | 1.49             |
|           | C22-C20              | 1.394            | 1.391             | 1.400            |
|           | C20-C18              | 1.383            | 1.384             | 1.380            |
|           | C18-C17              | 1.404            | 1.404             | 1.416            |
|           | C17-C14              | 1.461            | 1.455             | 1.440            |
|           | C14-C13              | 1.373            | 1.389             | 1.385            |
|           | C13-C16              | 1.410            | 1.392             | 1.396            |
|           | C16-C15              | 1.376            | 1.392             | 1.394            |
|           | C15-C7               | 1.440            | 1.414             | 1.412            |
|           | C7-S2                | 1.750            | 1.749             | 1.771            |
|           | S2-C6                | 1.750            | 1.755             | 1.771            |
|           | C6-C2                | 1.440            | 1.407             | 1.409            |
| TZ1       | F1-C19               | 1.347            | 1.341             | 1.355            |
|           | C19-C13              | 1.504            | 1.514             | 1.487            |
|           | C13-C15              | 1.391            | 1.40              | 1.397            |
|           | C15-C17              | 1.385            | 1.38              | 1.38             |
|           | C17-C18              | 1.4              | 1.408             | 1.414            |
|           | C18-C1               | 1.463            | 1.439             | 1.433            |
|           | C1-N1                | 1.304            | 1.331             | 1.324            |
|           | N1-C3                | 1.357            | 1.323             | 1.337            |
|           | C3-C2                | 1.374            | 1.412             | 1.398            |
|           | C2-C5                | 1.439            | 1.403             | 1.407            |
|           | C5-S2                | 1.746            | 1.746             | 1.767            |
|           | S2-C4                | 1.762            | 1.761             | 1.788            |
|           | TZ2                  | F4-C20           | 1.351             | 1.344            |
| C20-C12   |                      | 1.503            | 1.513             | 1.487            |
| C12-C10   |                      | 1.393            | 1.394             | 1.4              |
| C10-C8    |                      | 1.383            | 1.38              | 1.377            |
| C8-C7     |                      | 1.404            | 1.411             | 1.418            |

|        |         |       |       |       |
|--------|---------|-------|-------|-------|
|        | C7-C5   | 1.462 | 1.441 | 1.433 |
|        | C5-C6   | 1.374 | 1.415 | 1.391 |
|        | C6-N2   | 1.358 | 1.325 | 1.336 |
|        | N2-C4   | 1.306 | 1.330 | 1.335 |
|        | C4-C3   | 1.443 | 1.406 | 1.4   |
|        | C3-S1   | 1.749 | 1.755 | 1.779 |
|        | S1-C2   | 1.744 | 1.731 | 1.771 |
|        | C2-C18  | 1.462 | 1.441 | 1.433 |
| TZ3    | F4-C20  | 1.348 | 1.343 | 1.352 |
|        | C20-C10 | 1.504 | 1.511 | 1.494 |
|        | C10-C8  | 1.391 | 1.394 | 1.394 |
|        | C8-C7   | 1.385 | 1.382 | 1.383 |
|        | C7-C9   | 1.4   | 1.403 | 1.407 |
|        | C9-C24  | 1.463 | 1.45  | 1.446 |
|        | C24-S4  | 1.762 | 1.758 | 1.777 |
|        | S4-C25  | 1.746 | 1.748 | 1.76  |
|        | C25-C22 | 1.439 | 1.414 | 1.416 |
|        | C22-C21 | 1.377 | 1.408 | 1.39  |
|        | C21-N3  | 1.356 | 1.328 | 1.338 |
|        | N3-C23  | 1.306 | 1.327 | 1.327 |
| C23-C4 | 1.439   | 1.41  | 1.407 |       |
| TZ4    | F4-C28  | 1.346 | 1.343 | 1.351 |
|        | C28-C15 | 1.503 | 1.51  | 1.492 |
|        | C15-C16 | 1.389 | 1.391 | 1.393 |
|        | C16-C18 | 1.387 | 1.384 | 1.384 |
|        | C18-C20 | 1.398 | 1.4   | 1.407 |
|        | C20-C4  | 1.463 | 1.452 | 1.443 |
|        | C4-N2   | 1.304 | 1.319 | 1.316 |
|        | N2-C6   | 1.357 | 1.337 | 1.343 |
|        | C6-C5   | 1.375 | 1.393 | 1.393 |
|        | C5-S2   | 1.746 | 1.748 | 1.76  |
|        | C5-C9   | 1.439 | 1.415 | 1.414 |
|        | C9-S3   | 1.75  | 1.749 | 1.77  |
|        | S3-C8   | 1.75  | 1.755 | 1.769 |
| C8-C12 | 1.439   | 1.407 | 1.411 |       |
| TZ5    | F2-C19  | 1.348 | 1.344 | 1.355 |
|        | C19-C13 | 1.502 | 1.509 | 1.491 |
|        | C13-C14 | 1.392 | 1.392 | 1.398 |
|        | C14-C16 | 1.385 | 1.383 | 1.379 |
|        | C16-C18 | 1.403 | 1.403 | 1.414 |
|        | C18-C1  | 1.462 | 1.453 | 1.442 |
|        | C1-S1   | 1.747 | 1.74  | 1.766 |
|        | S1-C2   | 1.747 | 1.753 | 1.763 |
|        | C2-C5   | 1.44  | 1.414 | 1.415 |
|        | C5-C6   | 1.377 | 1.408 | 1.392 |
|        | C6-N1   | 1.356 | 1.328 | 1.337 |
|        | N1-C4   | 1.306 | 1.327 | 1.329 |
|        | C4-C23  | 1.439 | 1.41  | 1.405 |

|        |         |       |       |       |
|--------|---------|-------|-------|-------|
| TZTZ1  | F4-C18  | 1.347 | 1.34  | 1.356 |
|        | C18-C10 | 1.504 | 1.515 | 1.484 |
|        | C10-C9  | 1.392 | 1.397 | 1.4   |
|        | C9-C7   | 1.385 | 1.378 | 1.379 |
|        | C7-C5   | 1.399 | 1.411 | 1.417 |
|        | C5-C1   | 1.462 | 1.432 | 1.426 |
|        | C1-S2   | 1.783 | 1.8   | 1.809 |
|        | S2-C3   | 1.737 | 1.724 | 1.753 |
|        | C3-N2   | 1.348 | 1.318 | 1.324 |
|        | N2-C4   | 1.309 | 1.331 | 1.336 |
|        | C4-C15  | 1.462 | 1.432 | 1.426 |
| TZTZ2  | F4-C26  | 1.352 | 1.346 | 1.361 |
|        | C26-C16 | 1.502 | 1.51  | 1.49  |
|        | C16-C18 | 1.392 | 1.392 | 1.4   |
|        | C18-C17 | 1.384 | 1.383 | 1.379 |
|        | C17-C15 | 1.403 | 1.406 | 1.416 |
|        | C15-C7  | 1.461 | 1.451 | 1.438 |
|        | C7-S3   | 1.746 | 1.742 | 1.767 |
|        | S3-C6   | 1.742 | 1.746 | 1.757 |
|        | C6-C4   | 1.441 | 1.409 | 1.412 |
|        | C4-N2   | 1.313 | 1.336 | 1.335 |
|        | N2-C3   | 1.345 | 1.318 | 1.326 |
|        | C3-S2   | 1.739 | 1.733 | 1.751 |
|        | S2-C1   | 1.783 | 1.792 | 1.802 |
|        | C1-C11  | 1.44  | 1.409 | 1.412 |
| TZTZ3  | H2-C6   | 1.076 | 1.077 | 1.076 |
|        | C6-S3   | 1.727 | 1.715 | 1.74  |
|        | S3-C7   | 1.75  | 1.753 | 1.764 |
|        | C7-C10  | 1.442 | 1.423 | 1.426 |
|        | C10-S4  | 1.748 | 1.746 | 1.767 |
|        | C10-C9  | 1.377 | 1.398 | 1.387 |
|        | C9-C12  | 1.406 | 1.384 | 1.395 |
|        | C12-C11 | 1.376 | 1.398 | 1.394 |
|        | C11-C1  | 1.439 | 1.409 | 1.411 |
|        | C1-N1   | 1.313 | 1.335 | 1.335 |
|        | N1-C2   | 1.345 | 1.32  | 1.326 |
|        | C2-S1   | 1.740 | 1.735 | 1.753 |
|        | C2-C3   | 1.385 | 1.418 | 1.402 |
|        | S1-C4   | 1.785 | 1.791 | 1.804 |
| C4-C14 | 1.439   | 1.409 | 1.411 |       |

**Table S5. (b)** Calculated bond angles for neutral, cationic and anionic geometries for the studied oligomers.

| Molecules | Atomic specification | Bond angle ( $\theta$ ) in degree |                   |                  |
|-----------|----------------------|-----------------------------------|-------------------|------------------|
|           |                      | Neutral geometry                  | Cationic geometry | Anionic geometry |
| T1        | C15-C13-C11          | 119.23                            | 119.71            | 120.31           |
|           | C13-C11-C9           | 120.16                            | 120.03            | 120.90           |
|           | C9-C10-C2            | 120.20                            | 120.37            | 121.60           |
|           | C10-C2-C1            | 128.44                            | 128.00            | 129.34           |
|           | C10-C2-S1            | 121.57                            | 121.78            | 121.95           |
|           | C4-C3-C7             | 129.03                            | 128.23            | 129.42           |
| T2        | C30-C22-C20          | 119.44                            | 120.58            | 120.07           |
|           | C18-C17-C14          | 120.18                            | 120.06            | 121.45           |
|           | C17-C14-S4           | 121.76                            | 121.68            | 121.82           |
|           | C16-C15-C7           | 128.98                            | 128.55            | 129.21           |
|           | C15-C7-S2            | 120.77                            | 121.57            | 121.33           |
|           | C6-C2-C1             | 129.08                            | 128.36            | 129.31           |
| TZ1       | C19-C13-C14          | 119.84                            | 119.60            | 120.25           |
|           | C18-C1-N1            | 123.92                            | 123.32            | 124.57           |
|           | C1-N1-C3             | 112.11                            | 112.28            | 112.85           |
|           | C2-C5-S2             | 122.53                            | 124.10            | 123.23           |
| TZ2       | C20-C12-C11          | 121.08                            | 119.87            | 121.01           |
|           | C7-C5-C6             | 128.28                            | 127.58            | 128.92           |
|           | C7-C5-S2             | 123.05                            | 123.88            | 123.47           |
|           | C4-C3-S1             | 121.17                            | 121.85            | 121.53           |
|           | N2-C4-C3             | 124.21                            | 123.55            | 125.02           |
|           | S1-C2-C18            | 123.02                            | 123.75            | 123.47           |
| TZ3       | C20-C10-C12          | 119.79                            | 119.61            | 119.97           |
|           | C9-C24-N4            | 123.99                            | 123.61            | 124.34           |
|           | C25-C22-S3           | 122.41                            | 123.66            | 122.95           |
|           | S3-C23-C4            | 121.05                            | 121.78            | 121.39           |
|           | C23-C4-N2            | 124.35                            | 123.69            | 124.90           |
| TZ4       | C28-C15-C17          | 118.87                            | 118.66            | 119.15           |
|           | C20-C4-N2            | 123.97                            | 123.67            | 124.43           |
|           | S2-C5-C9             | 122.48                            | 123.36            | 123.04           |
|           | C8-C12-C11           | 129.11                            | 128.35            | 129.35           |
| TZ5       | C19-C13-C15          | 119.80                            | 119.73            | 121.05           |
|           | C18-C1-C27           | 128.48                            | 128.07            | 129.17           |
|           | C18-C1-S1            | 121.52                            | 121.61            | 121.78           |
|           | C2-C5-C6             | 129.07                            | 127.83            | 129.16           |
|           | N1-C4-C23            | 124.35                            | 123.72            | 124.91           |
|           | C4-C23-S3            | 121.11                            | 121.81            | 121.46           |
| TZTZ1     | C18-C10-C8           | 120.05                            | 119.76            | 120.69           |
|           | C5-C1-S2             | 121.68                            | 121.71            | 122.06           |
|           | C15-C4-N2            | 123.49                            | 123.36            | 124.59           |
|           | S1-C2-N1             | 133.07                            | 133.10            | 132.84           |

|       |             |        |        |        |
|-------|-------------|--------|--------|--------|
| TZTZ2 | C26-C16-C14 | 120.29 | 119.55 | 121.07 |
|       | C15-C7-C8   | 128.50 | 128.14 | 129.28 |
|       | C15-C7-S3   | 121.44 | 121.46 | 121.74 |
|       | C6-C4-N2    | 122.84 | 122.35 | 123.66 |
|       | N2-C3-S2    | 132.89 | 132.90 | 132.75 |
|       | C1-C11-S4   | 123.06 | 123.78 | 123.16 |
|       | C1-C11-C12  | 126.36 | 125.63 | 127.06 |
| TZTZ3 | C5-C6-S3    | 111.68 | 112.40 | 111.12 |
|       | C7-C10-C9   | 129.09 | 128.24 | 129.54 |
|       | C7-C10-S4   | 120.76 | 121.36 | 121.12 |
|       | C11-C1-N1   | 122.90 | 122.33 | 123.69 |
|       | C11-C1-S2   | 122.20 | 122.77 | 122.55 |
|       | S2-C3-N2    | 132.88 | 132.90 | 132.73 |

**Table S5. (c)** Calculated dihedral angle ( $\varphi$ ) in neutral, cationic and anionic geometries of the studied oligomers.

| Molecules | Atomic specification of adjacent rings | Torsion angle ( $\varphi$ ) in degree |                   |                  |
|-----------|----------------------------------------|---------------------------------------|-------------------|------------------|
|           |                                        | Neutral geometry                      | Cationic geometry | Anionic geometry |
| T1        | C9-C10-C2-C1                           | 27.25                                 | 1.58              | 0.27             |
|           | C4-C3-C7-S2                            | 21.41                                 | 0.17              | 0.33             |
|           | S2-C6-C18-C16                          | 27.02                                 | 1.80              | 0.04             |
| T2        | C18-C17-C14-C13                        | 24.52                                 | 19.54             | 0.79             |
|           | C16-C15-C7-S2                          | 15.02                                 | 2.00              | 0.12             |
|           | S2-C6-C2-C1                            | 22.6                                  | 0.86              | 0.00             |
|           | C4-C3-C11-S3                           | 16.75                                 | 2.26              | 0.13             |
|           | S3-C10-C27-C25                         | 23.23                                 | 21.14             | 0.6              |
| TZ1       | C17-C18-C1-S1                          | 0.365                                 | 0.04              | 0.11             |
|           | S1-C2-C5-C6                            | 0.24                                  | 0.00              | 0.02             |
|           | N2-C4-C9-C11                           | 0.18                                  | 0.19              | 0.09             |
| TZ2       | C8-C7-C5-C6                            | 27.94                                 | 0.91              | 0.4              |
|           | N2-C4-C3-S1                            | 0.14                                  | 0.10              | 0.16             |
|           | S1-C2-C18-C16                          | 28.46                                 | 2.15              | 0.10             |
| TZ3       | C7-C9-C24-S4                           | 0.36                                  | 0.18              | 0.05             |
|           | S4-C25-C22-C21                         | 3.19                                  | 0.12              | 0.10             |
|           | N3-C23-C4-S2                           | 0.02                                  | 0.00              | 0.01             |
|           | S2-C5-C2-C3                            | 3.15                                  | 0.14              | 0.09             |
|           | N1-C1-C16-C18                          | 0.13                                  | 0.40              | 0.14             |
| TZ4       | C18-C20-C4-S2                          | 2.01                                  | 0.02              | 0.10             |
|           | S2-C5-C9-C10                           | 9.76                                  | 0.13              | 0.01             |
|           | C7-C8-C12-S4                           | 15.5                                  | 0.13              | 0.05             |
|           | S4-C13-C2-C3                           | 13.08                                 | 0.39              | 0.02             |
|           | N1-C1-C22-C24                          | 1.44                                  | 0.39              | 0.24             |
| TZ5       | C16-C18-C1-C27                         | 24.66                                 | 15.16             | 1.18             |
|           | C3-C2-C5-S2                            | 14.75                                 | 2.32              | 0.36             |
|           | S2-C4-C23-N2                           | 0.04                                  | 0.05              | 0.01             |
|           | C21-C23-C25-S4                         | 15.02                                 | 2.54              | 0.45             |

|       |                |       |       |      |
|-------|----------------|-------|-------|------|
|       | S4-C24-C9-C7   | 25.06 | 15.24 | 0.94 |
| TZTZ1 | C7-C5-C1-S2    | 2.04  | 0.42  | 0.78 |
|       | C1-S2-C3-N2    | 0.23  | 0.21  | 0.14 |
|       | N2-C4-C15-C13  | 1.37  | 0.16  | 0.42 |
| TZTZ2 | C17-C15-C7-C8  | 22.93 | 12.33 | 0.06 |
|       | C5-C6-C4-N2    | 0.62  | 0.53  | 0.03 |
|       | C4-N2-C3-S2    | 0.12  | 0.14  | 0.00 |
|       | S2-C1-C11-S4   | 1.62  | 0.65  | 0.05 |
|       | S4-C10-C21-C19 | 21.9  | 13.45 | 0.13 |
| TZTZ3 | C8-C7-C10-S4   | 18.0  | 0.01  | 0.01 |
|       | S4-C11-C1-S2   | 2.78  | 0.00  | 0.00 |
|       | C1-S2-C3-N2    | 0.02  | 0.00  | 0.00 |
|       | N2-C4-C14-C13  | 2.30  | 0.00  | 0.00 |
|       | C16-C15-C18-S6 | 17.96 | 0.02  | 0.01 |

**Table S6.** Calculated hole mobility ( $\mu$ ) at different stacking angles ( $\theta$ ) for thiophene (T1, T2), thiazole (TZ1-TZ5) and thiazolothiazole (TZTZ1-TZTZ3) oligomers.

| Stacking angle ( $\theta$ ) in degree | Mobility ( $\mu$ ) in $cm^2/Vs$ |       |                      |        |       |       |       |                              |       |       |
|---------------------------------------|---------------------------------|-------|----------------------|--------|-------|-------|-------|------------------------------|-------|-------|
|                                       | Thiophene derivatives           |       | Thiazole derivatives |        |       |       |       | Thiazolothiazole derivatives |       |       |
|                                       | T1                              | T2    | TZ1                  | TZ2    | TZ3   | TZ4   | TZ5   | TZTZ1                        | TZTZ2 | TZTZ3 |
| 0                                     | 2.753                           | 7.518 | 5.203                | 3.113  | 7.647 | 8.442 | 8.944 | 3.945                        | 4.069 | 4.308 |
| 15                                    | 1.433                           | 3.775 | 3.279                | 1.675  | 3.203 | 4.077 | 3.616 | 2.803                        | 1.901 | 1.624 |
| 30                                    | 0.443                           | 0.638 | 1.284                | 0.437  | 0.490 | 1.255 | 0.468 | 1.413                        | 0.565 | 0.315 |
| 45                                    | 0.096                           | 0.110 | 0.352                | 0.025  | 0.010 | 0.179 | 0.014 | 0.688                        | 0.243 | 0.131 |
| 60                                    | 0.059                           | 0.026 | 0.070                | 0.001  | 0.013 | 0.005 | 0.011 | 0.530                        | 0.200 | 0.120 |
| 75                                    | 0.027                           | 0.018 | 0.010                | 0.001  | 0.010 | 0.007 | 0.009 | 0.142                        | 0.066 | 0.041 |
| 90                                    | 0.027                           | 0.015 | 0.000                | 0.0002 | 0.000 | 0.018 | 0.000 | 0.103                        | 0.054 | 0.037 |

**Table S7.** Calculated electron mobility ( $\mu$ ) at different stacking angles ( $\theta$ ) for thiophene (T1, T2), thiazole (TZ1-TZ5) and thiazolothiazole (TZTZ1-TZTZ3) oligomers.

| Stacking angle ( $\theta$ ) in degree | Mobility ( $\mu$ ) in $cm^2/Vs$ |       |                      |       |       |        |       |                              |        |        |
|---------------------------------------|---------------------------------|-------|----------------------|-------|-------|--------|-------|------------------------------|--------|--------|
|                                       | Thiophene derivatives           |       | Thiazole derivatives |       |       |        |       | Thiazolothiazole derivatives |        |        |
|                                       | T1                              | T2    | TZ1                  | TZ2   | TZ3   | TZ4    | TZ5   | TZTZ1                        | TZTZ2  | TZTZ3  |
| 0                                     | 0.558                           | 3.437 | 9.197                | 0.755 | 23.44 | 15.686 | 5.616 | 3.338                        | 4.424  | 13.951 |
| 15                                    | 0.205                           | 0.862 | 3.071                | 0.260 | 5.502 | 2.637  | 2.185 | 1.267                        | 1.064  | 3.698  |
| 30                                    | 0.009                           | 0.042 | 0.507                | 0.074 | 1.560 | 2.186  | 0.600 | 0.070                        | 0.136  | 0.258  |
| 45                                    | 0.051                           | 0.174 | 0.137                | 0.065 | 0.512 | 0.629  | 0.116 | 0.081                        | 0.0005 | 0.003  |
| 60                                    | 0.404                           | 0.554 | 0.454                | 0.191 | 0.938 | 0.189  | 0.280 | 0.506                        | 0.230  | 0.629  |
| 75                                    | 0.258                           | 0.792 | 1.329                | 0.337 | 2.367 | 1.105  | 0.771 | 0.170                        | 0.067  | 0.238  |
| 90                                    | 0.230                           | 0.667 | 1.794                | 0.340 | 3.212 | 1.920  | 1.026 | 0.000                        | 0.002  | 0.000  |

**Table S8.** Site energy difference ( $\Delta\varepsilon$ ) at different stacking angles for hole transport in thiophene (T1, T2), thiazole (TZ1-TZ5) and thiazolothiazole (TZTZ1-TZTZ3) oligomers.

| Stacking angle ( $\theta$ ) in deg. | Thiophene derivatives |       | Thiazole derivatives |       |       |       |       | Thiazolothiazole derivatives |       |       |
|-------------------------------------|-----------------------|-------|----------------------|-------|-------|-------|-------|------------------------------|-------|-------|
|                                     | T1                    | T2    | TZ1                  | TZ2   | TZ3   | TZ4   | TZ5   | TZTZ1                        | TZTZ2 | TZTZ3 |
| 0                                   | 0.005                 | 0.004 | 0.002                | 0.072 | 0.002 | 0.052 | 0.001 | 0.114                        | 0.004 | 0     |
| 15                                  | 0.062                 | 0.046 | 0.051                | 0.001 | 0.047 | 0.038 | 0.026 | 0.026                        | 0.002 | 0.006 |
| 30                                  | 0.104                 | 0.050 | 0.083                | 0.029 | 0.049 | 0.042 | 0.051 | 0.054                        | 0.011 | 0.046 |
| 45                                  | 0.106                 | 0.037 | 0.104                | 0.057 | 0.017 | 0.004 | 0.081 | 0.069                        | 0.017 | 0.032 |
| 60                                  | 0.073                 | 0.040 | 0.081                | 0.042 | 0.002 | 0.023 | 0.055 | 0.043                        | 0.038 | 0.032 |
| 75                                  | 0.095                 | 0.055 | 0.042                | 0.035 | 0.005 | 0.034 | 0.018 | 0.036                        | 0.025 | 0.015 |
| 90                                  | 0.084                 | 0.062 | 0.002                | 0.030 | 0.004 | 0.048 | 0.001 | 0                            | 0.014 | 0     |

**Table S9.** Site energy difference ( $\Delta\varepsilon$ ) at different stacking angles for electron transport in thiophene (T1, T2), thiazole (TZ1-TZ5) and thiazolothiazole (TZTZ1-TZTZ3) oligomers.

| Stacking angle ( $\theta$ ) in deg. | Thiophene derivatives |       | Thiazole derivatives |       |       |       |       | Thiazolothiazole derivatives |       |       |
|-------------------------------------|-----------------------|-------|----------------------|-------|-------|-------|-------|------------------------------|-------|-------|
|                                     | T1                    | T2    | TZ1                  | TZ2   | TZ3   | TZ4   | TZ5   | TZTZ1                        | TZTZ2 | TZTZ3 |
| 0                                   | 0.015                 | 0.023 | 0.001                | 0.036 | 0.001 | 0.040 | 0     | 0.008                        | 0.006 | 0     |
| 15                                  | 0.073                 | 0.055 | 0.028                | 0.022 | 0.056 | 0.031 | 0.006 | 0.017                        | 0.006 | 0.007 |
| 30                                  | 0.104                 | 0.060 | 0.059                | 0.027 | 0.077 | 0.044 | 0.010 | 0.041                        | 0.001 | 0.039 |
| 45                                  | 0.099                 | 0.040 | 0.084                | 0.026 | 0.049 | 0.006 | 0.031 | 0.047                        | 0.003 | 0.025 |
| 60                                  | 0.080                 | 0.048 | 0.081                | 0.031 | 0.024 | 0.043 | 0.021 | 0.061                        | 0.017 | 0.021 |
| 75                                  | 0.102                 | 0.079 | 0.046                | 0.016 | 0.011 | 0.064 | 0.075 | 0.030                        | 0.015 | 0.011 |
| 90                                  | 0.105                 | 0.101 | 0.001                | 0.021 | 0.021 | 0.078 | 0.001 | 0.002                        | 0.012 | 0     |
